# Supplementary material for: Green synthesis of a silver nanoparticle–graphene oxide composite and its application for As(iii) detection
Source: Royal Society of Chemistry journal article supplement (doi:10.1039/c4ra00934g), 2014-01-01
Supplement: c4ra00934g1.pdf [file c4ra00934g1.pdf]

**Supplementary material**

**Green synthesis of a silver nanoparticles–graphene oxide composite and its application for As (III) detection**

Riyaz Ahmad Dar<sup>a</sup>, Daniel P. Cole<sup>b</sup>, Ninad G. Khare<sup>a</sup>, Shashi P. Karna<sup>b</sup> and Ashwini Kumar Srivastava<sup>a,\*</sup>

<sup>a</sup>*Department of Chemistry, University of Mumbai, Vidyanagari, Mumbai-400098, India*

<sup>b</sup>US Army Research Laboratory, Weapons and Materials Research laboratory, RDRL-WM, Aberdeen Proving Ground, Maryland-21005-5069, USA

\*Corresponding author. Tel: +91-22-26543570. E-mail addresses:  
aksrivastava@chem.mu.ac.in; akschbu@yahoo.com (A. K. Srivastava)

## Figures

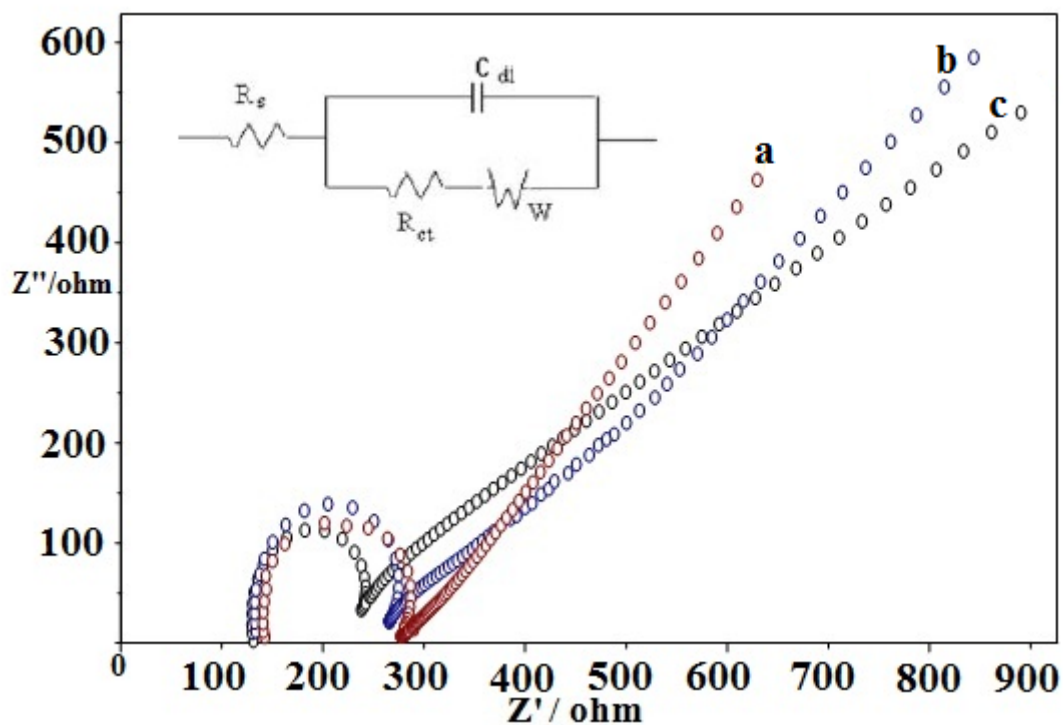

**Fig. S1.** Nyquist plots for (a) bare GCE, (b) GO/GCE, (c) AgNP/GO/GCE, in 0.1 M KCl solution containing 1.0 mM  $K_3[Fe(CN)_6]$ . The frequency range of EIS was from  $10^{-1}$  to  $10^6$  Hz at the formal potential of 0.17 V.

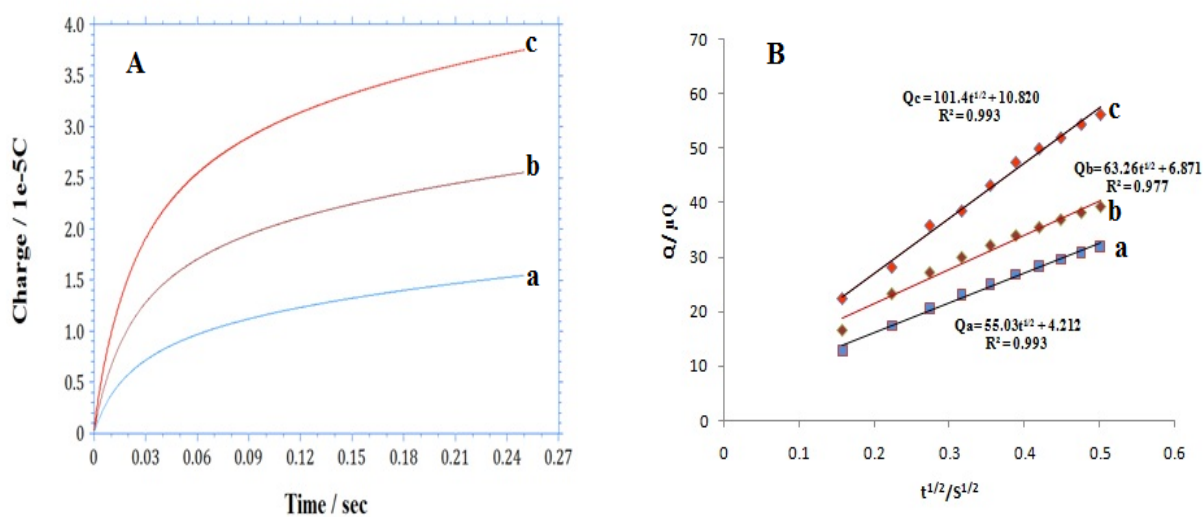

**Fig. S2.** (A) Plot of  $Q-t$  curves for the GCE (a), GO/GCE (b), AgNP/GO/GCE (c) in 0.5 mM  $K_3[Fe(CN)_6]$ ; (B): Plot of  $Q-t^{1/2}$  curves for GCE (a), GO/GCE (b), AgNP/GO/GCE (c).

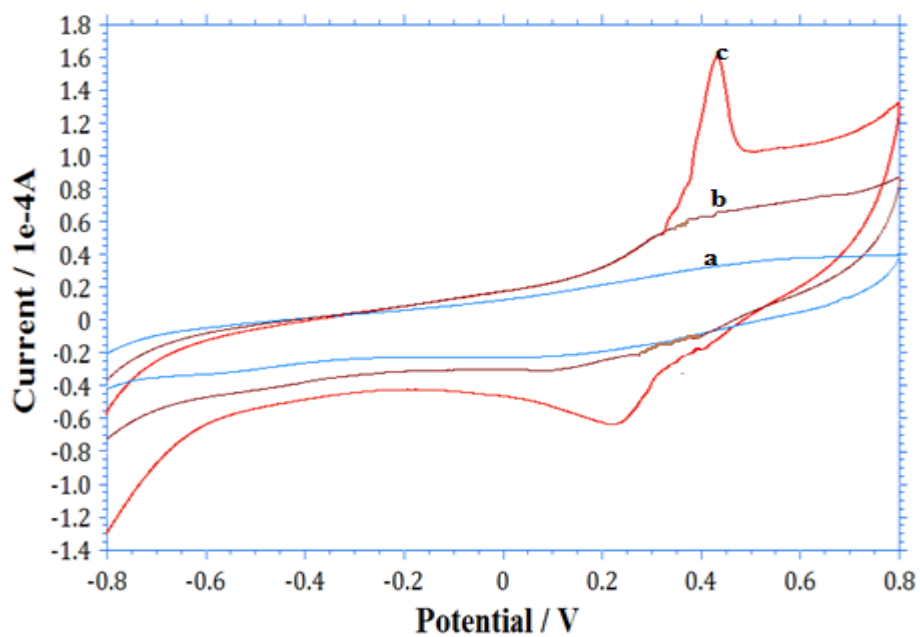

**Fig. S3.** CVs obtained at (a) bare GCE, (b) GO/GCE and (c) AgNP/GO/GCE in 0.1M H<sub>2</sub>SO<sub>4</sub> at 100 mVs<sup>-1</sup> in absence of arsenic and in a potential range of -0.8V to 0.8V.

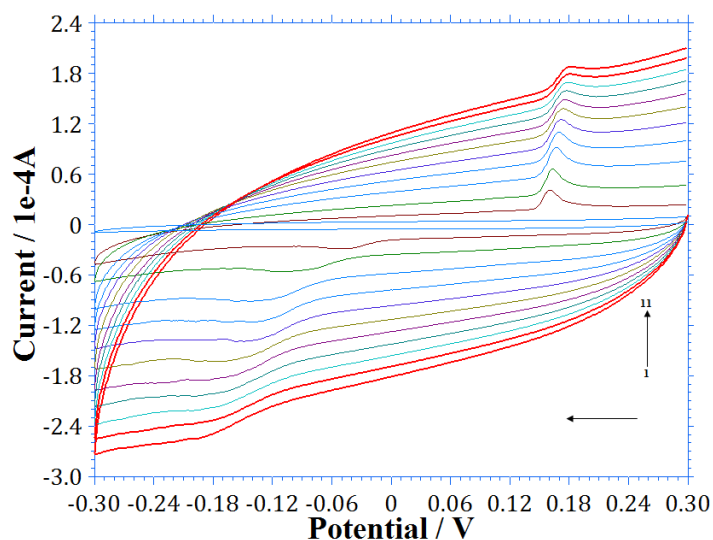

**Fig.S4.** Typical CVs obtained for the As (III)/As (0) redox couple at a AgNP/GO/GCE in 0.1M H<sub>2</sub>SO<sub>4</sub> solution containing 1.33x10<sup>-7</sup> M As(III) at various potential scan rates of 1) 20, 2) 50, 3) 100, 4) 150, 5) 200, 6) 250, 7) 300 ,8) 350, 9) 400, 10) 450, 11) 500 mV s<sup>-1</sup>.

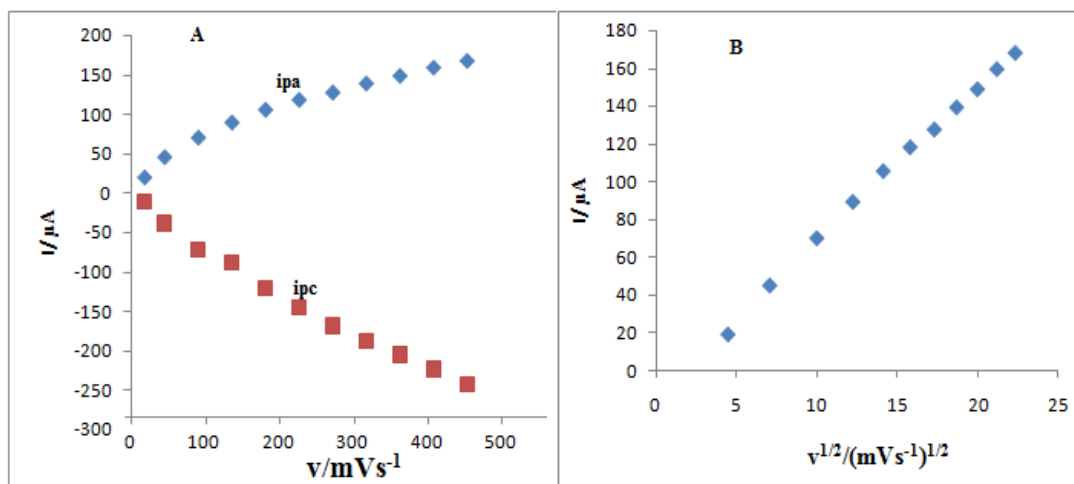

**Fig. S5.** (A) Plots of peak current ( $I_{pa}$ ,  $I_{pc}$ ) vs. potential scan rate ( $v$ ) and (B)  $I_{pa}$  vs.  $V^{1/2}$ .

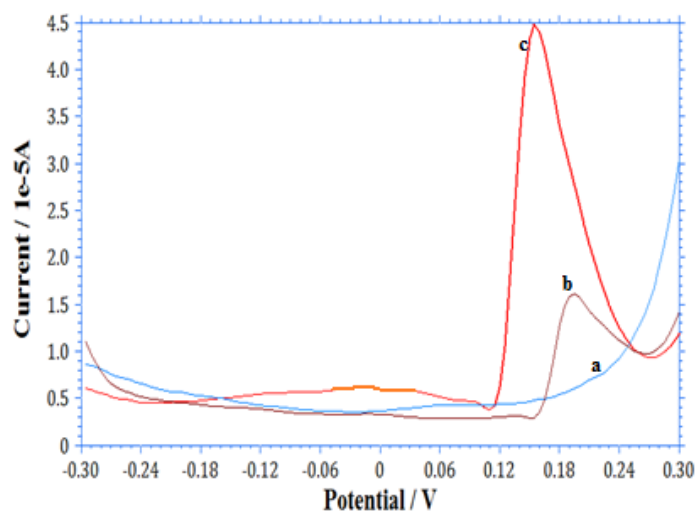

**Fig. S6.** SW-ASV at: (a) bare GCE, (b) GO/GCE, and (c) AgNP/GO/GCE containing  $3.99 \times 10^{-7}$  M As (III). Deposition potential: -0.60 V for 120 s, rest period: 10 s. Frequency: 40Hz, pulse amplitude: 25 mV.

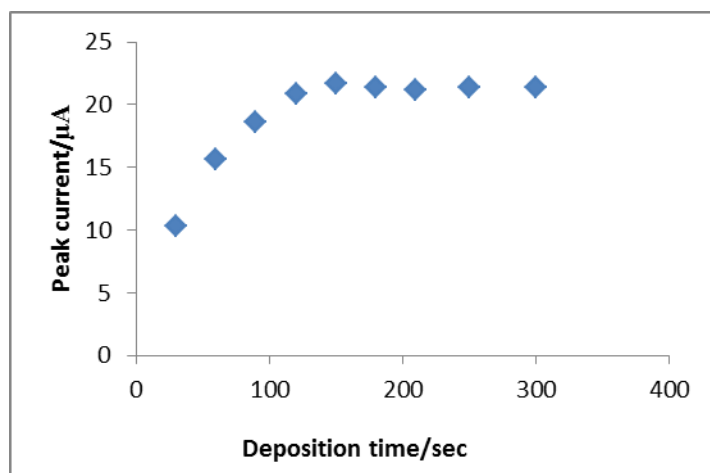

**Fig. S7.** Effect of deposition time on the stripping peak current at AgNPs/GO/GC electrode in 0.1M  $\text{H}_2\text{SO}_4$  containing  $3.99 \times 10^{-8}$  M As (III) using SW-ASV at Frequency: 40Hz, pulse amplitude: 25 mV. Deposition potential:-0.60 V for rest period: 10 s. Stirring speed 300 rpm.

## Tables

**Table S1** Interferences of other species on the anodic stripping peak current of  $2.65 \times 10^{-7} \text{ M As (III)}$ .

| Interferents                                                      | Concentrations(M)     | Signal change (%) |
|-------------------------------------------------------------------|-----------------------|-------------------|
| NaCl                                                              | $3.33 \times 10^{-3}$ | +1.4              |
| CaCl <sub>2</sub>                                                 | $3.33 \times 10^{-3}$ | 3.8               |
| MgCl <sub>2</sub>                                                 | $3.33 \times 10^{-3}$ | +2.4              |
| Na <sub>2</sub> SO <sub>4</sub>                                   | $1.33 \times 10^{-4}$ | 3.6               |
| CaSO <sub>4</sub> )                                               | $1.33 \times 10^{-4}$ | +4.2              |
| MgSO <sub>4</sub>                                                 | $1.33 \times 10^{-4}$ | +3.4              |
| KH <sub>2</sub> PO <sub>4</sub> , K <sub>2</sub> HPO <sub>4</sub> | $1.63 \times 10^{-3}$ | +1.2              |
| EDTA                                                              | $6.67 \times 10^{-3}$ | 3.4               |
| SDS                                                               | $1.33 \times 10^{-3}$ | 2.8               |
| TX-100                                                            | $1.33 \times 10^{-3}$ | 3.2               |

**Table S2** Precision and accuracy for assay of arsenic in pre analyzed samples by the proposed procedure (SW-AS- Voltammetry).

| Added<br>(10 <sup>-8</sup> M) | Found <sup>a</sup><br>(10 <sup>-8</sup> M) | (%R)   | Precision<br>(% R.S.D, n=5) | Accuracy<br>(% Bias) |
|-------------------------------|--------------------------------------------|--------|-----------------------------|----------------------|
| Intraday                      |                                            |        |                             |                      |
| 2.0                           | 1.98                                       | 99.0   | 1.02                        | -1.0                 |
| 5.0                           | 4.97                                       | 99.4   | 0.78                        | -0.60                |
| 8.0                           | 8.04                                       | 100.5  | 1.30                        | 0.50                 |
| Interday                      |                                            |        |                             |                      |
| 7.90                          | 8.143                                      | 101.88 | 1.89                        | 1.88                 |
| 8.00                          | 8.12                                       | 101.5  | 1.97                        | 1.5                  |
| 10.00                         | 9.72                                       | 97.2   | 1.33                        | -2.8                 |

**Average of five measurements**
